# Supplementary material
Source: HighWire-hosted journal article supplement (https://hw-f5-jim.highwire.org/content/70/2/376)
Supplement: inline-supplementary-material-1 [file inline-supplementary-material-1.pdf]

Supplementary Table S1: Predictors of In-Hospital Mortality

| <b>Effect</b>                       | <b>Effect level</b>  | <b>OR (95% CI)</b> |
|-------------------------------------|----------------------|--------------------|
| <b>Age</b>                          | 65-74                | reference          |
|                                     | 75-84                | 1.07(1.04, 1.1)    |
|                                     | ≥ 85                 | 1.14(1.11, 1.18)   |
| <b>Gender</b>                       | Male                 | reference          |
|                                     | Female               | 0.95(0.93, 0.97)   |
| <b>Marital status</b>               | Married              | reference          |
|                                     | Single               | 0.96(0.94, 0.99)   |
|                                     | Unknown              | 1.26(0.93, 1.72)   |
|                                     | Other                | 1.04(0.98, 1.1)    |
| <b>Race</b>                         | White                | reference          |
|                                     | Hispanic             | 1.19(1.04, 1.36)   |
|                                     | Black                | 0.98(0.94, 1.02)   |
|                                     | Unknown              | 1.19(0.81, 1.74)   |
|                                     | Others               | 1.08(1.04, 1.13)   |
| <b>Insurance status</b>             | Medicare             | reference          |
|                                     | Managed Care         | 1.01(0.95, 1.08)   |
|                                     | Medicaid             | 1.02(0.94, 1.11)   |
|                                     | Commercial Indemnity | 1.06(0.96, 1.16)   |
|                                     | Others               | 1.15(1.06, 1.25)   |
| <b>Dialysis</b>                     |                      | 1.07(1.02, 1.12)   |
| <b>Admit from SNF/ICF</b>           |                      | 1.31(1.27, 1.36)   |
| <b>Combined comorbidities</b>       |                      | 1.21(1.2, 1.22)    |
| <b>COPD</b>                         |                      | 0.75(0.74, 0.77)   |
| <b>Congestive heart failures</b>    |                      | 0.96(0.93, 0.98)   |
| <b>Diabetes</b>                     |                      | 0.96(0.93, 0.98)   |
| <b>Obesity</b>                      |                      | 0.86(0.82, 0.89)   |
| <b>Solid tumor w/out metastasis</b> |                      | 1.49(1.36, 1.63)   |
| <b>Metastatic cancer</b>            |                      | 0.91(0.87, 0.96)   |
| <b>Liver disease</b>                |                      | 1.49(1.4, 1.58)    |
| <b>Low functional status</b>        |                      | 1.22(1.19, 1.25)   |
| <b>Paralysis</b>                    |                      | 1.04(0.99, 1.08)   |
| <b>Smoker</b>                       |                      | 0.92(0.88, 0.96)   |
| <b>Pressure ulcer</b>               |                      | 1.48(1.43, 1.53)   |
| <b>Dementia</b>                     |                      | 0.75(0.73, 0.78)   |
| <b>UTI</b>                          |                      | 1.2(1.17, 1.23)    |
| <b>DNR</b>                          |                      | 2.29(2.24, 2.35)   |
| <b>Hospital Characteristics</b>     |                      |                    |

| <b>Effect</b>          | <b>Effect level</b> | <b>OR (95% CI)</b> |
|------------------------|---------------------|--------------------|
| <b>Academic status</b> | Teaching            | reference          |
|                        | Non-teaching        | 0.98 (0.9, 1.06)   |
| <b>Urban/rural</b>     | Urban               | reference          |
|                        | Rural               | 1.0 (0.92, 1.1)    |
| <b>Bed size</b>        | ≤ 200 Beds          | reference          |
|                        | 201 - 400 Beds      | 1.21 (1.12, 1.32)  |
|                        | ≥ 401 Beds          | 1.30 (1.18, 1.44)  |
| <b>Hospital region</b> | West                | reference          |
|                        | Northeast           | 1.04(0.92, 1.17)   |
|                        | Midwest             | 0.74(0.66, 0.83)   |
|                        | South               | 0.95(0.87, 1.05)   |
