# Supplementary material
Source: HighWire-hosted journal article supplement (https://hw-f5-jim.highwire.org/content/70/2/376)
Supplement: inline-supplementary-material-2 [file inline-supplementary-material-2.pdf]

Supplementary Table S2: Predictors of ICU admission

| <b>Effect</b>                       | <b>Effect level</b>  | <b>OR(95%CI)</b> |
|-------------------------------------|----------------------|------------------|
| <b>Age</b>                          | 75-84                | 0.77(0.76,0.78)  |
|                                     | ≥ 85                 | 0.54(0.53,0.55)  |
|                                     | 65-74                | reference        |
| <b>Gender</b>                       | Female               | 0.91(0.89,0.92)  |
|                                     | Male                 | reference        |
| <b>Marital status</b>               | Other                | 0.95(0.91,0.99)  |
|                                     | Single               | 0.99(0.97,1)     |
|                                     | Unknown              | 1.12(0.9,1.39)   |
|                                     | Married              | reference        |
| <b>Race</b>                         | Black                | 1.01(0.98,1.04)  |
|                                     | Hispanic             | 0.88(0.81,0.97)  |
|                                     | Others               | 1.09(1.06,1.12)  |
|                                     | Unknown              | 0.93(0.71,1.21)  |
|                                     | White                | reference        |
| <b>Insurance status</b>             | Commercial Indemnity | 1.02(0.96,1.08)  |
|                                     | Managed Care         | 1.02(0.98,1.06)  |
|                                     | Medicaid             | 1.12(1.06,1.18)  |
|                                     | Others               | 1.08(1.02,1.14)  |
|                                     | Medicare             | reference        |
| <b>DIALYSIS</b>                     |                      | 0.95(0.92,0.98)  |
| <b>Admit from SNF/ICF</b>           |                      | 1.25(1.22,1.28)  |
| <b>Combined comorbidities</b>       |                      | 1.22(1.21,1.22)  |
| <b>COPD</b>                         |                      | 0.92(0.91,0.93)  |
| <b>Congestive heart failures</b>    |                      | 1.15(1.13,1.17)  |
| <b>Diabetes</b>                     |                      | 1.05(1.03,1.07)  |
| <b>Obesity</b>                      |                      | 1.27(1.24,1.3)   |
| <b>Solid tumor w/out metastasis</b> |                      | 1.11(1.03,1.19)  |
| <b>Metastatic cancer</b>            |                      | 0.4(0.39,0.42)   |
| <b>Liver disease</b>                |                      | 1.1(1.05,1.15)   |
| <b>Low functional status</b>        |                      | 1.34(1.32,1.36)  |
| <b>Paralysis</b>                    |                      | 1.21(1.17,1.25)  |
| <b>Smoker</b>                       |                      | 1.25(1.22,1.28)  |
| <b>Pressure ulcer</b>               |                      | 1.41(1.38,1.45)  |
| <b>Dementia</b>                     |                      | 0.73(0.72,0.74)  |
| <b>UTI</b>                          |                      | 1.39(1.37,1.42)  |
| <b>DNR</b>                          |                      | 1.07(1.05,1.09)  |
| <b>Teaching hospital</b>            | NO                   | 1.02(0.87,1.18)  |
|                                     | YES                  | reference        |
| <b>Urban/rural</b>                  | RURAL                | 0.87(0.75,1.01)  |

| <b>Effect</b>          | <b>Effect level</b> | <b>OR(95%CI)</b> |
|------------------------|---------------------|------------------|
|                        | URBAN               | reference        |
| <b>Bed size</b>        | 201 - 400 Beds      | 1.22(1.06,1.4)   |
|                        | ≥ 401 Beds          | 1.17(0.98,1.39)  |
|                        | ≤ 200 Beds          | reference        |
| <b>Hospital region</b> | MIDWEST             | 1(0.83,1.21)     |
|                        | NORTHEAST           | 0.73(0.59,0.91)  |
|                        | SOUTH               | 1(0.85,1.18)     |
|                        | WEST                | reference        |
